# Supplementary material for: Changes in diazotrophic community structure associated with Kuroshio succession in the northern South China Sea
Source: Copernicus journal article supplement (doi:10.5194/bg-21-2529-2024), 2024-05-27
Supplement: Supplementary file 1 [file bg-21-2529-2024-supplement.pdf]

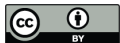

*Supplement of*

## **Changes in diazotrophic community structure associated with Kuroshio succession in the northern South China Sea**

**Han Zhang et al.**

*Correspondence to:* Tuo Shi (tuoshi@sdu.edu.cn)

The copyright of individual parts of the supplement might differ from the article licence.

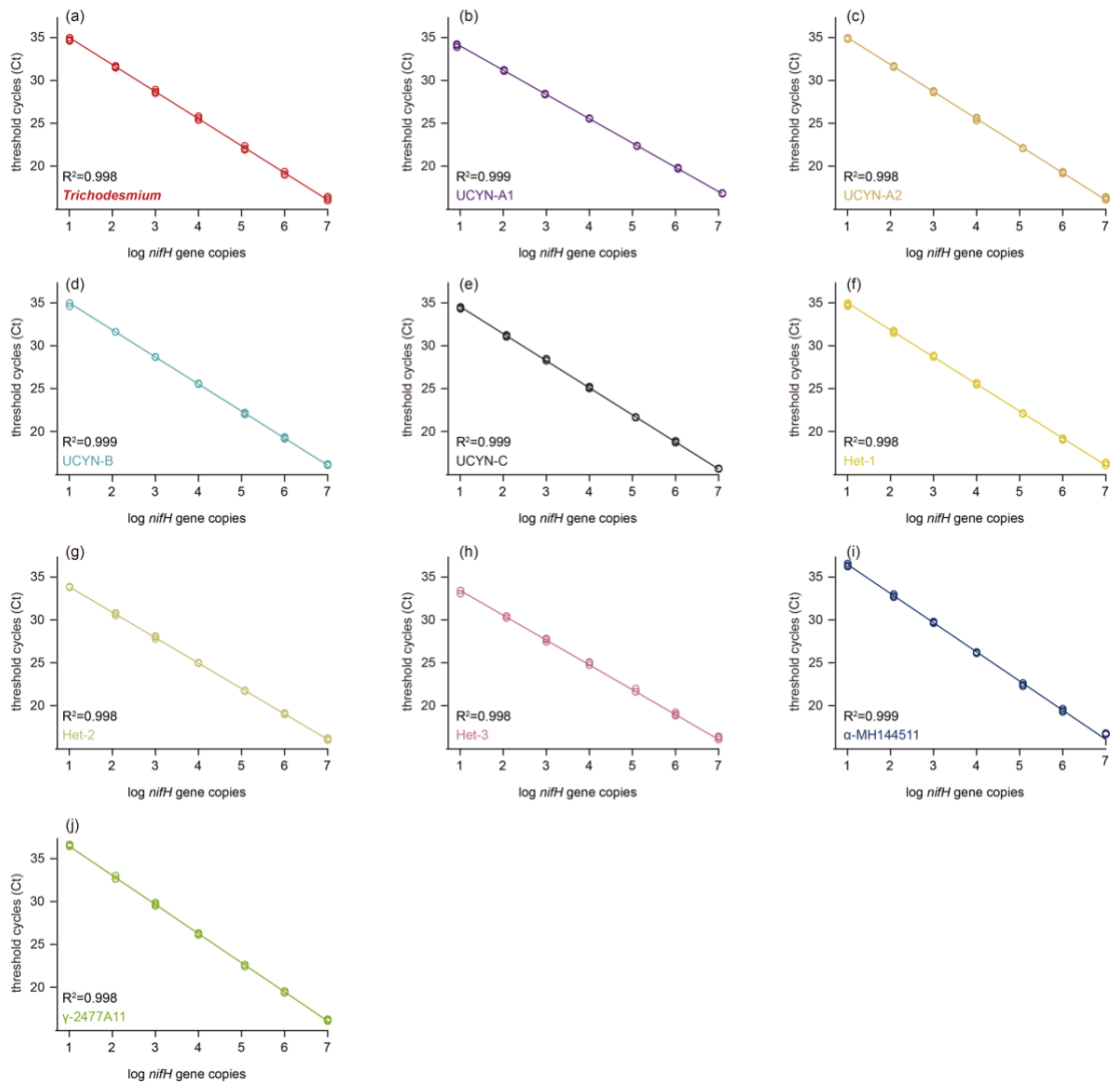

Figure S1. Representative standard curves for qPCR. (a) *Trichodesmium*; (b) UCYN-A1; (c) UCYN-A2; (d) UCYN-B; (e) UCYN-C; (f) Het-1; (g) Het-2; (h) Het-3; (i)  $\alpha$ -MH144511; (j)  $\gamma$ -2477A11.

Table S1. Sampling information.

| Station <sup>a)</sup> | Location             | Sampling time (yyyy/mm/dd) | Sampling depth (m) <sup>b)</sup> |
|-----------------------|----------------------|----------------------------|----------------------------------|
| stn1                  | 22.016° N/123.023° E | 2017/07/14                 | 5; 25; 50; 75; 100; 115          |
| stn4*                 | 21.000° N/119.500° E | 2017/07/19                 | 5; 25; 50; 75; 100; 115          |
| stn9*                 | 18.000° N/116.000° E | 2017/07/27                 | 5; 25; 50; 85; 100; 150          |
| stn11                 | 16.550° N/115.432° E | 2017/08/01                 | 5; 25; 55; 75; 100; 150          |
| stn12                 | 15.154° N/114.789° E | 2017/08/04                 | 5; 25; 50; 60; 100; 150          |
| stn2                  | 22.000° N/122.500° E | 2018/06/27                 | 5; 50; 75; 100; 150              |
| stn3                  | 21.500° N/122.500° E | 2018/06/25                 | 5; 25; 75; 100; 150              |
| stn4*                 | 21.000° N/119.500° E | 2018/06/22                 | 5; 25; 75; 100; 150              |
| stn5                  | 20.500° N/119.000° E | 2018/06/21                 | 5; 25; 75; 100; 150              |
| stn6                  | 20.000° N/118.400° E | 2018/06/22                 | 5; 25; 75; 100; 150              |
| stn7                  | 19.500° N/117.980° E | 2018/06/30                 | 5; 25; 75; 100; 150              |
| stn8                  | 19.000° N/117.000° E | 2018/07/03                 | 5; 25; 75; 100; 150              |
| stn9*                 | 18.000° N/116.000° E | 2018/07/05                 | 5; 25; 75; 100; 150              |
| stn10                 | 17.000° N/115.000° E | 2018/07/07                 | 5; 25; 75; 100; 150              |

Note: a) The same stations sampled in both 2017 and 2018 are marked with an asterisk (\*). b) Samples collected at the 5 m water depth were used for qPCR and NGS.

Table S2. GenBank accession numbers of sequence standards used to target specific N<sub>2</sub>-fixing taxa.

| Species              | Accession | Reference              |
|----------------------|-----------|------------------------|
| UCYN-A1              | AF059627  | Zehr et al., 1998      |
| UCYN-A2              | KF806604  | Thompson et al., 2014  |
| UCYN-B               | AF299418  | Zehr et al., 2001      |
| Het-1                | DQ118191  | Church et al., 2005b   |
| Het-2                | DQ225754  | Foster and Zehr, 2006  |
| Het-3                | DQ225762  | Foster and Zehr, 2006  |
| $\alpha$ -MH144511   | MH144511  | Chen et al., 2019      |
| $\gamma$ -24774A11   | EU052318  | Moisander et al., 2008 |
| UCYN-C               | HQ455916  | This study             |
| <i>Trichodesmium</i> | L00689    | This study             |

Table S3. Oligonucleotide primer and probe sequences utilized for TaqMan qPCR.

| Species              | Forward (5'→3')                 | Probe (5'→3')                        | Reverse (5'→3')                    | Reference              |
|----------------------|---------------------------------|--------------------------------------|------------------------------------|------------------------|
| <i>Trichodesmium</i> | GACGAAGTATTGAAGCCAGGTTT<br>C    | CATTAAGTGTGTTGAATCTGGTG<br>GTCCTGAGC | CGGCCAGCGCAACCTA                   | Church et al., 2005a   |
| UCYN-A1              | TAGCTGCAGAAAGAGGAACTGT<br>AGAAG | TAATTCCTGGCTATAACAAC                 | TCAGGACCACCGGACTCAAC               | Langlois et al., 2008  |
| UCYN-A2              | GGTTACAACAACGTTTTATGTGT<br>TGA  | TCTGGTGGTCCTGAGCCCGGA                | ACCACGACCAGCACATCCA                | Thompson et al., 2014  |
| UCYN-B               | CGTAATGCTCGAAGGGTTTGA           | CAAGTGTGTAGAATCTGGTGGTC<br>CTGAGCC   | CACGACCAGCACAACTCAACT              | Moisander et al., 2010 |
| UCYN-C               | TCTACCCGTTTGATGCTACACAC<br>TAA  | AAACTACCATTCTTCACTTAGCA<br>G         | GGTATCCTTCAAGTAGTACTTCG<br>TCTAGCT | Langlois et al., 2008  |
| Het-1                | CGGTTTCCGTGGTGTACGTT            | TCCGGTGGTCCTGAGCCTGGTGT              | AATACCACGACCCGCACAAC               | Church et al., 2005b   |
| Het-2                | TGGTTACCGTGATGTACGTT            | TCTGGTGGTCCTGAGCCTGGTGT              | AATGCCGCGACCAGCACACAAC             | Moisander et al., 2010 |
| Het-3                | CGGTTTCCGTGGCGTACGTT            | TCCGGTGGTCCAGAACCTGGTGT              | AATACCACGACCAGCACACAAC             | Foster et al., 2007    |
| $\alpha$ -MH144511   | ACGGCGCCTACGAGGATATCGAT<br>T    | ACGTGCTGGGCGACGTTGTCTGC              | CTGCGCCTTGTTCTCGCGGAT              | Chen et al., 2019      |
| $\gamma$ -24774A11   | CGGTAGAGGATCTTGAGCTTGAA         | AAGTGCTTAAGGTTGGCTTTGGC<br>GACA      | CACCTGACTCCACGCACTTG               | Moisander et al., 2008 |

Table S4. Abundance of the ten major diazotrophic groups determined based on TaqMan qPCR assay of the *nifH* gene (copies L<sup>-1</sup>).

| Year | Station | Time (hh: mm) | <i>Trichodesmium</i> | UCYN-A1            | UCYN-A2            | UCYN-B             | UCYN-C             | Het-1              | Het-2              | Het-3              | $\alpha$ -MH144511 | $\gamma$ -2477A11  |
|------|---------|---------------|----------------------|--------------------|--------------------|--------------------|--------------------|--------------------|--------------------|--------------------|--------------------|--------------------|
| 2017 | stn1    | 10: 00        | $5.79 \times 10^5$   | $4.82 \times 10^2$ | $3.00 \times 10^3$ | $8.31 \times 10^4$ | $3.70 \times 10^2$ | $1.32 \times 10^4$ | BDL                | $9.37 \times 10^2$ | $8.84 \times 10^4$ | $1.44 \times 10^4$ |
| 2017 | stn4*   | 13: 00        | $1.28 \times 10^6$   | $6.32 \times 10^4$ | $1.83 \times 10^3$ | $3.31 \times 10^6$ | $6.34 \times 10^2$ | $2.00 \times 10^4$ | BDL                | BDL                | $2.46 \times 10^5$ | $2.97 \times 10^4$ |
| 2017 | stn9*   | 10: 00        | $5.47 \times 10^5$   | $5.69 \times 10^4$ | $5.72 \times 10^2$ | $1.59 \times 10^6$ | $8.53 \times 10^2$ | $1.06 \times 10^3$ | BDL                | $3.85 \times 10^4$ | $7.47 \times 10^4$ | $5.18 \times 10^4$ |
| 2017 | stn11   | 15: 00        | $3.78 \times 10^6$   | $4.80 \times 10^4$ | $2.47 \times 10^4$ | $3.10 \times 10^6$ | $9.20 \times 10^2$ | $9.38 \times 10^2$ | $4.54 \times 10^2$ | $6.71 \times 10^3$ | $5.49 \times 10^5$ | $1.09 \times 10^4$ |
| 2017 | stn12   | 13: 00        | $5.47 \times 10^5$   | $1.28 \times 10^3$ | $1.49 \times 10^3$ | $3.17 \times 10^3$ | $4.80 \times 10^2$ | $3.98 \times 10^2$ | BDL                | $4.47 \times 10^2$ | $1.77 \times 10^4$ | $2.15 \times 10^4$ |
| 2018 | stn3    | 15: 30        | $1.35 \times 10^5$   | $1.74 \times 10^2$ | $1.87 \times 10^2$ | $8.88 \times 10^3$ | $5.31 \times 10^3$ | $2.56 \times 10^3$ | $1.01 \times 10^2$ | $1.92 \times 10^2$ | $5.68 \times 10^1$ | $5.30 \times 10^1$ |
| 2018 | stn4*   | 15: 00        | $5.24 \times 10^3$   | $1.60 \times 10^2$ | $1.44 \times 10^2$ | $2.55 \times 10^4$ | $6.27 \times 10^2$ | $9.20 \times 10^1$ | $8.24 \times 10^1$ | BDL                | $6.11 \times 10^1$ | $4.56 \times 10^1$ |
| 2018 | stn7    | 10: 40        | $5.81 \times 10^4$   | $2.76 \times 10^3$ | $2.58 \times 10^3$ | $1.45 \times 10^5$ | $1.89 \times 10^3$ | $2.38 \times 10^2$ | $1.48 \times 10^2$ | $3.88 \times 10^1$ | BDL                | $2.52 \times 10^1$ |
| 2018 | stn9*   | 14: 30        | $5.24 \times 10^3$   | $5.80 \times 10^2$ | $5.44 \times 10^2$ | $1.22 \times 10^5$ | $1.05 \times 10^3$ | $3.19 \times 10^2$ | BDL                | $5.39 \times 10^2$ | $1.62 \times 10^2$ | $3.85 \times 10^2$ |
| 2018 | stn10   | 05: 00        | $1.24 \times 10^4$   | $2.31 \times 10^3$ | $9.15 \times 10^2$ | $3.37 \times 10^5$ | $1.70 \times 10^3$ | $8.99 \times 10^2$ | $2.93 \times 10^2$ | $7.22 \times 10^2$ | $6.45 \times 10^2$ | $1.15 \times 10^2$ |

Note: The same stations sampled in both 2017 and 2018 are marked with an asterisk (\*). BDL, below detection limit.

Table S5. Relative abundance of the ten major diazotrophic groups determined based on TaqMan qPCR assay of the *nifH* gene (copies L<sup>-1</sup>).

| Year | Station | Time (hh: mm) | <i>Trichodesmium</i> | UCYN-A1 | UCYN-A2 | UCYN-B | UCYN-C | Het-1 | Het-2 | Het-3 | $\alpha$ -MH144511 | $\gamma$ -2477A11 |
|------|---------|---------------|----------------------|---------|---------|--------|--------|-------|-------|-------|--------------------|-------------------|
| 2017 | stn1    | 10: 00        | 0.74                 | 0.00    | 0.00    | 0.11   | 0.00   | 0.02  | 0.00  | 0.00  | 0.11               | 0.02              |
| 2017 | stn4*   | 13: 00        | 0.26                 | 0.01    | 0.00    | 0.67   | 0.00   | 0.00  | 0.00  | 0.00  | 0.05               | 0.01              |
| 2017 | stn9*   | 10: 00        | 0.23                 | 0.02    | 0.00    | 0.67   | 0.00   | 0.00  | 0.00  | 0.02  | 0.03               | 0.02              |
| 2017 | stn11   | 15: 00        | 0.50                 | 0.00    | 0.00    | 0.41   | 0.00   | 0.00  | 0.00  | 0.00  | 0.07               | 0.02              |
| 2017 | stn12   | 13: 00        | 0.92                 | 0.00    | 0.00    | 0.01   | 0.00   | 0.00  | 0.00  | 0.00  | 0.03               | 0.04              |
| 2018 | stn3    | 15: 30        | 0.89                 | 0.00    | 0.00    | 0.06   | 0.03   | 0.02  | 0.00  | 0.00  | 0.00               | 0.00              |
| 2018 | stn4*   | 15: 00        | 0.17                 | 0.01    | 0.01    | 0.79   | 0.02   | 0.00  | 0.00  | 0.00  | 0.00               | 0.00              |
| 2018 | stn7    | 10: 40        | 0.28                 | 0.01    | 0.01    | 0.69   | 0.01   | 0.00  | 0.00  | 0.00  | 0.00               | 0.00              |
| 2018 | stn9*   | 14: 30        | 0.04                 | 0.01    | 0.01    | 0.93   | 0.01   | 0.00  | 0.00  | 0.01  | 0.00               | 0.00              |
| 2018 | stn10   | 05: 00        | 0.03                 | 0.01    | 0.03    | 0.92   | 0.01   | 0.00  | 0.00  | 0.00  | 0.00               | 0.00              |

Note: The same stations sampled in both 2017 and 2018 are marked with an asterisk (\*).

Table S6. Number of OTUs corresponding to various diazotrophic lineages at designated stations as detected via NGS.

| Taxonomy                 | 2017  |       |       |       |       | 2018  |       |       |       |       |       |       |       |       |  |
|--------------------------|-------|-------|-------|-------|-------|-------|-------|-------|-------|-------|-------|-------|-------|-------|--|
|                          | stn1  | stn4* | stn9* | stn11 | stn12 | stn2  | stn3  | stn4* | stn5  | stn6  | stn7  | stn8  | stn9* | stn10 |  |
| <i>Trichodesmium</i>     | 26910 | 16480 | 10983 | 5567  | 6050  | 19142 | 13541 | 12310 | 4542  | 6816  | 5644  | 13222 | 5683  | 5139  |  |
| UCYN-A                   | 0     | 26    | 0     | 7     | 4     | 336   | 252   | 5     | 566   | 259   | 123   | 772   | 1     | 1     |  |
| UCYN-B                   | 4345  | 797   | 3398  | 28    | 7473  | 5214  | 7267  | 18765 | 9276  | 10029 | 13139 | 10282 | 13459 | 17818 |  |
| UCYN-C                   | 234   | 1     | 0     | 24599 | 0     | 0     | 7     | 3     | 3     | 27    | 17    | 6     | 3     | 5     |  |
| Other<br>Cyanobacteria   | 42    | 391   | 21    | 64    | 45    | 570   | 414   | 12    | 33    | 8     | 1942  | 223   | 575   | 261   |  |
| $\alpha$ -proteobacteria | 0     | 0     | 0     | 0     | 0     | 64    | 37    | 10    | 2     | 0     | 0     | 48    | 46    | 27    |  |
| $\beta$ -proteobacteria  | 0     | 0     | 0     | 0     | 0     | 99    | 195   | 1     | 2     | 0     | 377   | 32    | 455   | 105   |  |
| $\gamma$ -proteobacteria | 4539  | 9339  | 18059 | 4254  | 22889 | 7451  | 9479  | 1051  | 13529 | 10161 | 7521  | 6199  | 7356  | 6157  |  |
| $\delta$ -proteobacteria | 0     | 0     | 0     | 0     | 0     | 5     | 2     | 4     | 0     | 8     | 1     | 0     | 0     | 8     |  |
| Other<br>Proteobacteria  | 31    | 1618  | 55    | 1414  | 46    | 0     | 0     | 0     | 0     | 0     | 0     | 0     | 0     | 0     |  |
| Actinobacteria           | 0     | 0     | 0     | 258   | 0     | 0     | 0     | 0     | 0     | 0     | 0     | 0     | 0     | 0     |  |
| Archaea                  | 0     | 0     | 0     | 1     | 0     | 0     | 0     | 0     | 0     | 0     | 0     | 0     | 0     | 0     |  |
| Bacteroidetes            | 0     | 247   | 1     | 0     | 0     | 0     | 0     | 0     | 0     | 0     | 0     | 0     | 0     | 0     |  |
| Firmicutes               | 9     | 168   | 0     | 194   | 6     | 0     | 12    | 0     | 0     | 0     | 16    | 6     | 0     | 0     |  |
| Planctomycetes           | 7     | 0     | 0     | 43    | 0     | 0     | 0     | 0     | 0     | 0     | 0     | 0     | 0     | 0     |  |
| Spirochaetes             | 0     | 26    | 0     | 0     | 0     | 0     | 0     | 0     | 0     | 0     | 0     | 0     | 0     | 0     |  |
| Verrucomicrobia          | 0     | 0     | 0     | 49    | 4     | 170   | 20    | 84    | 52    | 3     | 2812  | 206   | 447   | 130   |  |
| Others                   | 402   | 7426  | 4002  | 41    | 2     | 526   | 2351  | 1332  | 5572  | 6266  | 1985  | 2581  | 5552  | 3926  |  |

Note: The same stations sampled in both 2017 and 2018 are marked with an asterisk (\*).

Table S7. Number and proportion (in brackets) of OTUs corresponding to specific diazotrophic subcommunities as detected via NGS with a 97% sequence similarity cutoff.

| <b>Diazotrophic subcommunities</b>  | <b>2017</b> | <b>2018</b> |
|-------------------------------------|-------------|-------------|
| All OTUs                            | 360         | 114         |
| Abundant taxa                       | 0           | 1 (0.9%)    |
| Conditionally abundant taxa         | 5 (1.4%)    | 3 (2.6%)    |
| Moderate taxa                       | 0           | 0           |
| Rare taxa                           | 32 (8.9%)   | 11 (9.6%)   |
| Conditionally rare taxa             | 290 (80.6%) | 77 (67.5%)  |
| Conditionally rare or abundant taxa | 33 (9.2%)   | 22 (19.3%)  |

Table S8. Mantel's test of correlations of geographical distance, environmental distance, and individual environmental factors with the diazotrophic subcommunities.

| <b>Sampling time</b> | <b>Factors</b> | <b>ALL</b> |          | <b>AT+CAT+CRAT</b> |          | <b>RT</b> |          | <b>CRT</b> |          |
|----------------------|----------------|------------|----------|--------------------|----------|-----------|----------|------------|----------|
|                      |                | <b>r</b>   | <b>P</b> | <b>r</b>           | <b>P</b> | <b>r</b>  | <b>P</b> | <b>r</b>   | <b>P</b> |
| 2017                 | Geo            | 0.058      | 0.255    | 0.251              | 0.002    | -0.039    | 0.651    | -0.032     | 0.65     |
|                      | Env            | 0.378      | 0.001    | 0.428              | 0.001    | 0.228     | 0.015    | 0.392      | 0.001    |
|                      | Stat_depth     | 0.348      | 0.001    | 0.348              | 0.001    | 0.161     | 0.007    | 0.256      | 0.012    |
|                      | Samp_depth     | 0.135      | 0.065    | 0.132              | 0.064    | 0.123     | 0.113    | 0.272      | 0.004    |
|                      | Temp           | 0.356      | 0.001    | 0.351              | 0.001    | 0.135     | 0.081    | 0.309      | 0.001    |
|                      | DO             | 0.040      | 0.310    | 0.044              | 0.290    | 0.012     | 0.441    | 0.039      | 0.299    |
|                      | Sal            | 0.428      | 0.002    | 0.425              | 0.001    | 0.178     | 0.036    | 0.376      | 0.001    |
|                      | MLD            | 0.426      | 0.001    | 0.421              | 0.001    | 0.210     | 0.022    | 0.422      | 0.001    |
|                      | Chl <i>a</i>   | 0.405      | 0.001    | 0.398              | 0.002    | 0.201     | 0.023    | 0.417      | 0.001    |
|                      | SSW            | 0.012      | 0.347    | 0.008              | 0.405    | 0.102     | 0.158    | 0.175      | 0.014    |
| 2018                 | Geo            | 0.054      | 0.376    | 0.050              | 0.386    | NA        | NA       | 0.211      | 0.159    |
|                      | Env            | -0.060     | 0.648    | -0.060             | 0.638    | NA        | NA       | -0.166     | 0.851    |
|                      | Stat_depth     | -0.036     | 0.539    | -0.038             | 0.586    | NA        | NA       | -0.096     | 0.727    |
|                      | Temp           | 0.050      | 0.384    | 0.050              | 0.379    | NA        | NA       | 0.069      | 0.397    |
|                      | DO             | 0.008      | -0.450   | 0.009              | 0.444    | NA        | NA       | -0.078     | 0.695    |
|                      | Sal            | 0.025      | 0.395    | 0.024              | 0.405    | NA        | NA       | 0.273      | 0.059    |
|                      | MLD            | -0.133     | 0.828    | -0.135             | 0.85     | NA        | NA       | 0.136      | 0.178    |
|                      | Chl <i>a</i>   | 0.461      | 0.003    | 0.460              | 0.004    | NA        | NA       | 0.136      | 0.174    |
|                      | SSW            | -0.061     | 0.650    | -0.064             | 0.641    | NA        | NA       | -0.121     | 0.782    |

Abbreviations: Geo, geographical distance; Env, environmental distance; Stat\_depth, station depth; Samp\_depth, sampling depth; Temp, temperature; Sal, salinity; MLD, mixed layer depth; Chl *a*, Chlorophyll *a*; DO, dissolved oxygen; SSW, sea surface wind. ALL, all taxa; AT, abundant taxa; CAT, conditionally abundant taxa; CRAT, conditionally rare and abundant taxa; CRT, conditionally rare taxa; RT, rare taxa. NA, not applicable.



Table S9. The importance components, eigenvalue proportion explained and cumulative proportion in redundancy analysis (RDA)

| Components | Eigenvalue | Proportion Explained | Cumulative Proportion |
|------------|------------|----------------------|-----------------------|
| RDA1       | 0.1640     | 0.5770               | 0.5770                |
| RDA2       | 0.0615     | 0.2164               | 0.7935                |
| RDA3       | 0.0309     | 0.1086               | 0.9021                |
| RDA4       | 0.0121     | 0.0426               | 0.9447                |
| RDA5       | 0.0065     | 0.0228               | 0.9675                |
| RDA6       | 0.0025     | 0.0087               | 0.9761                |
| RDA7       | 0.0011     | 0.0040               | 0.9802                |
| RDA8       | 0.0009     | 0.0031               | 0.9833                |
| RDA9       | 0.0003     | 0.0012               | 0.9845                |
| RDA10      | 0.0001     | 0.0003               | 0.9847                |
| RDA11      | 0.0000     | 0.0001               | 0.9848                |
| RDA12      | 0.0000     | 0.0000               | 0.9849                |
| RDA13      | 0.0043     | 0.0151               | 1                     |

Table S10. Contribution of the environments factors and major diazotrophic groups to the variations explained by the RDA. The environmental factors used in this study are shown in Table S4.

|                           |                          | RDA1    | RDA2    |
|---------------------------|--------------------------|---------|---------|
| Environments factors      | SST                      | -0.0952 | 0.5214  |
|                           | SSS                      | -0.1040 | 0.7065  |
|                           | MLD                      | 0.1829  | 0.4228  |
|                           | DCM                      | 0.0851  | 0.8747  |
|                           | I <sub>DIN</sub>         | -0.8404 | -0.2569 |
|                           | I <sub>DIP</sub>         | -0.9077 | -0.1455 |
|                           | Nit                      | -0.8394 | 0.1058  |
|                           | I <sub>NFR</sub>         | -0.3828 | 0.4466  |
|                           | I <sub>PP</sub>          | -0.3233 | -0.5956 |
|                           | S <sub>NFR</sub>         | -0.6608 | 0.0791  |
|                           | S <sub>PP</sub>          | -0.4627 | -0.5505 |
| <i>R<sub>K_100</sub></i>  | 0.1800                   | 0.6767  |         |
| Major diazotrophic groups | <i>Trichodesmium</i>     | 0.0110  | 0.5879  |
|                           | UCYN-B                   | -0.7612 | -0.1394 |
|                           | UCYN-C                   | 0.5982  | -0.1114 |
|                           | $\gamma$ -proteobacteria | 0.2126  | -0.1731 |

Abbreviations: I<sub>NFR</sub>, depth-integrated N<sub>2</sub> fixation rate; SST, surface seawater temperature; SSS, sea surface salinity; MLD, mixed layer depth; I<sub>DIP</sub>, depth-integrated dissolved inorganic phosphorus; I<sub>DIN</sub>, depth-integrated dissolved inorganic nitrogen; Nit, nitracline; S<sub>PP</sub>: surface primary productivity; I<sub>PP</sub>, depth-integrated primary productivity; *R<sub>K\_100</sub>*, averaged Kuroshio fractions in the upper 100 m (*R<sub>K\_100</sub>*, %);

## References

- Chen, M., Lu, Y., Jiao, N., Tian, J., Kao, S. J., and Zhang, Y.: Biogeographic drivers of diazotrophs in the western Pacific Ocean, *Limnol. Oceanogr.*, 64, 1403-1421, <https://doi.org/10.1002/lno.11123>, 2019.
- Church, M. J., Jenkins, B. D., Karl, D. M., and Zehr, J. P.: Vertical distributions of nitrogen-fixing phylotypes at Stn ALOHA in the oligotrophic North Pacific Ocean, *Aquat. Microb. Ecol.*, 38, 3-14, <https://doi.org/10.3354/AME038003>, 2005a.
- Church, M. J., Short, C. M., Jenkins, B. D., Karl, D. M., and Zehr, J. P.: Temporal patterns of nitrogenase gene (*nifH*) expression in the oligotrophic North Pacific Ocean, *Appl. Environ. Microb.*, 71, 5362-5370, <https://doi.org/10.1128/Aem.71.9.5362-5370.2005>, 2005b.
- Foster, R. A., and Zehr, J. P.: Characterization of diatom-cyanobacteria symbioses on the basis of *nifH*, *hetR* and 16S rRNA sequences, *Environ. Microb.*, 8, 1913-1925, <https://doi.org/10.1111/j.1462-2920.2006.01068.x>, 2006.
- Foster, R. A., Subramaniam, A., Mahaffey, C., Carpenter, E. J., Capone, D. G., and Zehr, J. P.: Influence of the Amazon River plume on distributions of free-living and symbiotic cyanobacteria in the western tropical north Atlantic Ocean, *Limnol. Oceanogr.*, 52, 517-532, <https://doi.org/10.4319/lo.2007.52.2.0517>, 2007.
- Langlois, R. J., D. Hummer., and J. LaRoche.: Abundances and distributions of the dominant *nifH* phylotypes in the Northern Atlantic Ocean. *Appl. Environ. Microbiol.*, 74, 1922-1931. <https://doi.org/10.1128/AEM.01720-07>, 2008.
- Moisander, P. H., Beinart, R. A., Voss, M., and Zehr, J. P.: Diversity and abundance of diazotrophic microorganisms in the South China Sea during intermonsoon, *ISME J.*, 2, 954-967, <https://doi.org/10.1038/ismej.2008.51>, 2008.
- Moisander, P. H., R. A. Beinart, I. Hewson, A. E. White, K. S. Johnson, C. A. Carlson, J. P. Montoya., and J. P. Zehr.: Unicellular cyanobacterial distributions broaden the oceanic N<sub>2</sub> fixation domain, *Science*, 327, 1512-1514. <https://doi.org/10.1126/science.1185468>, 2010.
- Thompson, A., Carter, B. J., Turk-Kubo, K., Malfatti, F., Azam, F., and Zehr, J. P.: Genetic diversity of the unicellular nitrogen-fixing cyanobacteria UCYN-A and its prymnesiophyte host, *Environ. Microbiol.*, 16, 3238-3249, <https://doi.org/10.1111/1462-2920.12490>, 2014.
- Zehr, J. P., Mellon, M. T., and Zani, S.: New nitrogen-fixing microorganisms detected in oligotrophic oceans by amplification of nitrogenase (*nifH*) genes, *Appl. Environ. Microb.*, 64, 3444-3450, <https://doi.org/10.1128/AEM.64.12.5067-5067.1998>, 1998.
- Zehr, J. P., Waterbury, J. B., Turner, P. J., Montoya, J. P., Omoregie, E., Steward, G. F., Hansen, A., and Karl, D. M.: Unicellular cyanobacteria fix N<sub>2</sub> in the subtropical North Pacific Ocean, *Nature*, 412, 635-638, <https://doi.org/10.1038/35088063>, 2001.
